# Supplementary material for: Phase separation by the polyhomeotic sterile alpha motif compartmentalizes Polycomb Group proteins and enhances their activity
Source: PubMed Central journal article supplement (PMC7644731; doi:10.1038/s41467-020-19435-z), 2020-11-05
Supplement: 41467_2020_19435_MOESM3_ESM.pdf [file 41467_2020_19435_MOESM3_ESM.pdf]

## **Description of Additional Supplementary Files**

File Name: Supplementary Data 1

Description: Analysis of sequence properties of Ph linkers. Table of linker sequences and parameters from localCIDER analysis.

File Name: Supplementary Movie 1

Description: Movie of Fusion of Mini-Ph-Chromatin condensates. Mini-Ph is labelled with Alexa 647.

File Name: Supplementary Movie 2

Description: Movie of Fusion of Mini-Ph-Chromatin condensates. Mini-Ph is labelled with Alexa 647.

File Name: Supplementary Movie 3

Description: Movie of Fusion of Mini-Ph-DNA condensates. Movie shows Mini-Ph labelled with Alexa 647.
